# Supplementary material
Source: PubMed Central journal article supplement (PMC7188189)
Supplement: NIHMS1579213-supplement-1.pdf [file NIHMS1579213-supplement-1.pdf]

Supplemental Table 1A. Frequency of SES and comorbid factors by race and age, Carolina Breast Cancer Study 3 (2008-2013)

| Demographic characteristics <sup>a</sup>          | Race and age, y                                   |                              |                              |                              |                              | <i>P</i> <sup>c</sup> |
|---------------------------------------------------|---------------------------------------------------|------------------------------|------------------------------|------------------------------|------------------------------|-----------------------|
|                                                   | All cases<br>(n=2,998)<br>Weighted % <sup>b</sup> | White                        |                              | Black                        |                              |                       |
|                                                   |                                                   | <50<br>(n=751)<br>Weighted % | ≥50<br>(n=752)<br>Weighted % | <50<br>(n=741)<br>Weighted % | ≥50<br>(n=754)<br>Weighted % |                       |
| <b>Socioeconomic position factors</b>             |                                                   |                              |                              |                              |                              |                       |
| Married                                           | 63.4                                              | 76.0                         | 67.6                         | 43.1                         | 39.8                         | <.001                 |
| Income (\$USD)                                    |                                                   |                              |                              |                              |                              | <.001                 |
| >50K                                              | 52.5                                              | 67.4                         | 56.7                         | 33.5                         | 24.4                         |                       |
| >15-50K                                           | 35.3                                              | 26.9                         | 34.2                         | 44.2                         | 47.6                         |                       |
| ≤15K                                              | 12.2                                              | 5.7                          | 9.2                          | 22.3                         | 28.1                         |                       |
| Education                                         |                                                   |                              |                              |                              |                              | <.001                 |
| Some college, technical school, college or higher | 71.1                                              | 84.6                         | 69.4                         | 70.3                         | 58.2                         |                       |
| HS graduate/GED                                   | 21.8                                              | 12.6                         | 24.1                         | 22.8                         | 26.1                         |                       |
| 0-12 years, but no HS degree                      | 7.1                                               | 2.8                          | 6.5                          | 6.9                          | 15.6                         |                       |
| Current Health insurance                          | 95.8                                              | 94.9                         | 97.6                         | 91.2                         | 92.3                         | <.001                 |
| Rural address                                     | 19.1                                              | 19.1                         | 21.3                         | 8.5                          | 16.4                         | <.001                 |
| <b>Comorbid factors</b>                           |                                                   |                              |                              |                              |                              |                       |
| Diabetes                                          | 13.8                                              | 2.8                          | 13.8                         | 8.8                          | 33.2                         | <.001                 |
| Heart Disease                                     | 6.6                                               | 0.9                          | 8.8                          | 2.3                          | 8.6                          | <.001                 |
| Current smoking status                            | 16.0                                              | 19.6                         | 12.9                         | 22.6                         | 19.2                         | <.001                 |
| BMI (kg/m <sup>2</sup> )                          |                                                   |                              |                              |                              |                              | <.001                 |
| ≤25                                               | 27.5                                              | 40.9                         | 28.0                         | 17.0                         | 11.6                         |                       |
| 25-30                                             | 30.6                                              | 27.6                         | 34.5                         | 24.2                         | 23.8                         |                       |
| >30                                               | 41.9                                              | 31.5                         | 37.5                         | 58.8                         | 64.6                         |                       |

Abbreviations: BMI, body mass index; HS, high school; GED, general education development

<sup>a</sup> All variables had <1% missing (married n=1; education n=1; current health insurance n=2; rural address n=1; diabetes n=0; heart disease n=0; current smoking status n=1; BMI n=12) except income which was missing n=24, 56, 26, 53 for younger black, older black, younger white, and older white women, respectively.

<sup>b</sup> Weighted percentages account for the different sampling probabilities for NC population estimates

<sup>c</sup> *P* values were calculated using two-sided chi-square test for all 4 groups (younger black, older black, younger white, and older white women)

Supplemental Table 1B. Frequency of SES and comorbid factors by race and age, women in the Behavioral Risk Factor Surveillance System (2010), by age and race

| Demographic characteristics <sup>a</sup>          | Race and age, y        |                  |        |                  |        |                |        |                |        |      | <i>P</i> <sup>b</sup> |
|---------------------------------------------------|------------------------|------------------|--------|------------------|--------|----------------|--------|----------------|--------|------|-----------------------|
|                                                   | All cases<br>(n=5,643) | White            |        |                  |        | Black          |        |                |        |      |                       |
|                                                   |                        | <50<br>(n=1,587) |        | ≥50<br>(n=2,965) |        | <50<br>(n=501) |        | ≥50<br>(n=590) |        |      |                       |
| % (SE)                                            | % (SE)                 | % (SE)           | % (SE) | % (SE)           | % (SE) | % (SE)         | % (SE) | % (SE)         | % (SE) |      |                       |
| <b>Socioeconomic position factors</b>             |                        |                  |        |                  |        |                |        |                |        |      |                       |
| Married                                           | 65.3                   | 0.95             | 73.8   | 1.60             | 70.4   | 1.07           | 41.4   | 3.19           | 40.0   | 2.93 | <.001                 |
| Income (\$USD)                                    |                        |                  |        |                  |        |                |        |                |        |      | <.001                 |
| >50K                                              | 47.9                   | 1.06             | 59.3   | 1.78             | 46.9   | 1.36           | 29.7   | 3.03           | 25.2   | 2.66 |                       |
| >15-50K                                           | 41.5                   | 1.04             | 34.7   | 1.74             | 43.9   | 1.33           | 51.9   | 3.31           | 48.3   | 3.16 |                       |
| ≤15K                                              | 10.6                   | 0.61             | 6.0    | 0.78             | 9.2    | 0.79           | 18.4   | 2.32           | 26.5   | 2.81 |                       |
| Education                                         |                        |                  |        |                  |        |                |        |                |        |      | <.001                 |
| Some college, technical school, college or higher | 65.4                   | 0.92             | 74.3   | 1.50             | 59.9   | 1.21           | 65.8   | 2.98           | 44.0   | 2.65 |                       |
| HS graduate/GED                                   | 26.9                   | 0.87             | 21.0   | 1.40             | 30.8   | 1.15           | 28.6   | 2.86           | 37.4   | 2.80 |                       |
| 0-12 years, but no HS degree                      | 7.6                    | 0.50             | 4.7    | 0.74             | 9.3    | 0.75           | 5.6    | 1.41           | 18.6   | 2.31 |                       |
| Current health insurance                          | 84.5                   | 0.79             | 83.0   | 1.34             | 91.2   | 0.78           | 74.6   | 2.92           | 79.9   | 2.45 | <.001                 |
| Rural address                                     | 32.3                   | 0.81             | 33.2   | 1.41             | 32.7   | 0.97           | 28.8   | 2.35           | 32.2   | 2.12 | 0.58                  |
| <b>Comorbid factors</b>                           |                        |                  |        |                  |        |                |        |                |        |      |                       |
| Diabetes                                          | 11.7                   | 0.58             | 5.8    | 0.76             | 14.4   | 0.85           | 10.5   | 1.79           | 31.3   | 2.81 | <.001                 |
| Heart Disease                                     | 3.6                    | 0.30             | 1.3    | 0.31             | 6.0    | 0.56           | 2.3    | 0.74           | 7.6    | 1.72 | <.001                 |
| Current Smoking status                            | 18.3                   | 0.77             | 21.0   | 1.41             | 15.6   | 0.97           | 16.4   | 2.08           | 19.1   | 2.29 | <.001                 |
| BMI (kg/m <sup>2</sup> )                          |                        |                  |        |                  |        |                |        |                |        |      | <.001                 |
| ≤25                                               | 37.7                   | 0.99             | 44.6   | 1.76             | 39.1   | 1.24           | 26.1   | 2.96           | 16.7   | 2.05 |                       |
| 25-30                                             | 31.7                   | 0.99             | 31.8   | 1.76             | 33.8   | 1.21           | 25.7   | 3.04           | 32.5   | 2.85 |                       |
| >30                                               | 30.5                   | 0.93             | 23.6   | 1.44             | 27.0   | 1.12           | 48.2   | 3.35           | 50.8   | 2.96 |                       |

Abbreviations: HS; high school; BMI, body mass index; GED, general education development

<sup>a</sup>All variables had <1% missing (married n=12; education n=2; current health insurance n=6; rural address n=0; diabetes n=2; heart disease n=36; current smoking status n=19; BMI n=12) except income which was missing n=39, 96, 160, 505 and BMI which was missing n=37, 31, 88, 183 for younger black, older black, younger white, and older white women, respectively.

<sup>b</sup> *P* values were calculated using two-sided chi-square test for all 4 groups (younger black, older black, younger white, and older white women)

Supplemental Table 2. Distribution of barriers to medical care by race and age, Carolina Breast Cancer Study 3 (2008-2013)

| Barriers to care <sup>a</sup>  | All cases<br>(n=2,998)<br>Weighted<br>% <sup>b</sup> | Race and age, y                 |                                 |                                 |                                 | <i>P</i> <sup>c</sup> |
|--------------------------------|------------------------------------------------------|---------------------------------|---------------------------------|---------------------------------|---------------------------------|-----------------------|
|                                |                                                      | White                           |                                 | Black                           |                                 |                       |
|                                |                                                      | <50<br>(n=751)<br>Weighted<br>% | ≥50<br>(n=752)<br>Weighted<br>% | <50<br>(n=741)<br>Weighted<br>% | ≥50<br>(n=754)<br>Weighted<br>% |                       |
| Current health insurance       | 95.8                                                 | 94.9                            | 97.6                            | 91.2                            | 92.3                            | <.05                  |
| Insurance type                 |                                                      |                                 |                                 |                                 |                                 |                       |
| Private                        | 57.6                                                 | 84.7                            | 51.7                            | 57.7                            | 41.0                            | <.001                 |
| Medicaid                       | 7.3                                                  | 6.8                             | 3.5                             | 26.9                            | 12.1                            | <.001                 |
| Medicare                       | 23.3                                                 | 2.4                             | 31.3                            | 4.6                             | 33.7                            | <.001                 |
| Other                          | 7.4                                                  | 0.9                             | 11.2                            | 1.9                             | 5.6                             | <.001                 |
| Uninsured                      | 4.3                                                  | 5.2                             | 2.4                             | 8.9                             | 7.7                             | <.05                  |
| Finance barrier to care        | 12.2                                                 | 14.0                            | 7.9                             | 28.7                            | 18.0                            | <.001                 |
| Transportation barrier to care | 5.6                                                  | 3.9                             | 3.1                             | 15.8                            | 12.7                            | <.001                 |
| Rural address                  | 19.1                                                 | 19.1                            | 21.3                            | 8.5                             | 16.4                            | <.001                 |
| Job loss as a result of cancer | 3.1                                                  | 3.9                             | 2.3                             | 6.1                             | 3.6                             | <.001                 |

<sup>a</sup> All variables had <1% missing (current health insurance n=5; insurance type n=2; rural address n=13; job loss n=25) except finance barrier and transportation barrier which were missing n=39 and n=40 for older white, n=50 and n=55 for younger white, n=64 and n=68 for older black and n=82 and n=83 for younger black women, respectively.

<sup>b</sup> Weighted percentages account for the different sampling probabilities for NC population estimates

<sup>c</sup> *P* values were calculated using two-sided chi-square test for all 4 groups (younger black, older black, younger white, and older white women)

Supplemental Table 3. Distribution, odds ratios and 95% confidence intervals for tumor characteristics by race and age, Carolina Breast Cancer Study 3 (2008-2013)

| Clinical characteristics          | Race and age, y       |      |                |      |                |                  |                |                  |                |                  |
|-----------------------------------|-----------------------|------|----------------|------|----------------|------------------|----------------|------------------|----------------|------------------|
|                                   | All cases<br>(n=2998) |      | White          |      |                |                  | Black          |                  |                |                  |
|                                   |                       |      | ≥50<br>(n=752) |      | <50<br>(n=751) |                  | ≥50<br>(n=754) |                  | <50<br>(n=741) |                  |
| %                                 | SE                    | %    | SE (95% CI)    | %    | SE (95% CI)    | %                | SE (95% CI)    | %                | SE (95% CI)    |                  |
| Tumor size, cm <sup>a</sup>       |                       |      |                |      |                |                  |                |                  |                |                  |
| ≤2                                | 58.7                  | 1.10 | 66.0           | 1.76 | 52.2           | 1.83             | 52.9           | 1.85             | 35.8           | 1.79             |
| >2                                | 41.3                  | 1.10 | 34.0           | 1.76 | 47.8           | 1.83             | 47.1           | 1.85             | 64.2           | 1.79             |
| <i>Missing</i>                    | 75                    |      | 25             |      | 8              |                  | 22             |                  | 20             |                  |
| OR of >2 vs. ≤2                   |                       |      | 1.0            | ref  | <b>1.8</b>     | <b>(1.4-2.2)</b> | <b>1.7</b>     | <b>(1.4-2.1)</b> | <b>3.5</b>     | <b>(2.8-4.3)</b> |
| Nodal status <sup>a</sup>         |                       |      |                |      |                |                  |                |                  |                |                  |
| Negative                          | 65.3                  | 1.06 | 70.5           | 1.67 | 59.2           | 1.8              | 61.8           | 1.78             | 51.0           | 1.85             |
| Positive                          | 34.7                  | 1.06 | 29.5           | 1.67 | 40.8           | 1.8              | 38.2           | 1.78             | 49.0           | 1.85             |
| <i>Missing</i>                    | 29                    |      | 6              |      | 3              |                  | 10             |                  | 10             |                  |
| OR of Positive vs. Negative       |                       |      | 1.0            | ref  | <b>1.6</b>     | <b>(1.3-2.0)</b> | <b>1.5</b>     | <b>(1.2-1.8)</b> | <b>2.3</b>     | <b>(1.9-2.8)</b> |
| Histologic grade <sup>a</sup>     |                       |      |                |      |                |                  |                |                  |                |                  |
| I and II                          | 64.6                  | 1.04 | 73.1           | 1.64 | 58.8           | 1.81             | 52.0           | 1.84             | 43.9           | 1.84             |
| III                               | 35.4                  | 1.04 | 26.9           | 1.64 | 41.2           | 1.81             | 48.0           | 1.84             | 56.1           | 1.84             |
| <i>Missing</i>                    | 64                    |      | 20             |      | 10             |                  | 19             |                  | 15             |                  |
| OR of III vs. I & II              |                       |      | 1.0            | ref  | <b>1.9</b>     | <b>(1.5-2.4)</b> | <b>2.5</b>     | <b>(2.0-3.1)</b> | <b>3.5</b>     | <b>(2.8-4.3)</b> |
| HR negative status <sup>b</sup>   |                       |      |                |      |                |                  |                |                  |                |                  |
| Negative                          | 21.1                  | 0.88 | 16.3           | 1.37 | 20.8           | 1.49             | 31.0           | 1.70             | 36.7           | 1.79             |
| <i>Missing</i>                    | 65                    |      | 24             |      | 7              |                  | 16             |                  | 18             |                  |
| OR of Negative vs. Positive       |                       |      | 1.0            | ref  | <b>1.3</b>     | <b>(1.0-1.8)</b> | <b>2.3</b>     | <b>(1.8-3.0)</b> | <b>3.0</b>     | <b>(2.3-3.8)</b> |
| PR negative status <sup>b</sup>   |                       |      |                |      |                |                  |                |                  |                |                  |
| Negative                          | 31.2                  | 1.03 | 26.7           | 1.64 | 28.0           | 1.65             | 45.0           | 1.83             | 46.4           | 1.86             |
| <i>Missing</i>                    | 72                    |      | 25             |      | 8              |                  | 18             |                  | 21             |                  |
| OR of Negative vs. Positive       |                       |      | 1.0            | ref  | 1.1            | (0.8-1.3)        | <b>2.2</b>     | <b>(1.8-2.8)</b> | <b>2.4</b>     | <b>(1.9-3.0)</b> |
| HER2 positive status <sup>b</sup> |                       |      |                |      |                |                  |                |                  |                |                  |
| Negative                          | 15.6                  | 0.82 | 14.2           | 1.29 | 17.3           | 1.39             | 16.6           | 1.37             | 18.6           | 1.45             |
| <i>Missing</i>                    | 67                    |      | 25             |      | 7              |                  | 18             |                  | 17             |                  |

|                                 |                |      |      |      |                      |      |                      |                      |                      |      |
|---------------------------------|----------------|------|------|------|----------------------|------|----------------------|----------------------|----------------------|------|
| OR of Positive vs. Negative     |                |      | 1.0  | ref  | <b>1.3 (1.0-1.7)</b> |      | 1.2 (0.9-1.6)        | <b>1.4 (1.0-1.8)</b> |                      |      |
| TN positive status <sup>b</sup> | 15.3           | 0.76 | 11.4 | 1.18 | 14.8                 | 1.30 | 23.8                 | 1.57                 | 28.2                 | 1.67 |
|                                 | <i>Missing</i> | 64   | 24   |      | 7                    |      | 16                   |                      | 17                   |      |
| OR of TN vs. non-TN             |                |      | 1.0  | ref  | <b>1.3 (1.0-1.8)</b> |      | <b>2.4 (1.8-3.2)</b> |                      | <b>3.0 (2.3-4.0)</b> |      |

Abbreviations: OR, odds ratio; CI, confidence interval; ER, estrogen receptor; PR, progesterone receptor; HER2, human epidermal growth factor receptor 2; TN, triple negative. <sup>a</sup>From medical records abstraction <sup>b</sup>From pathology reports abstraction

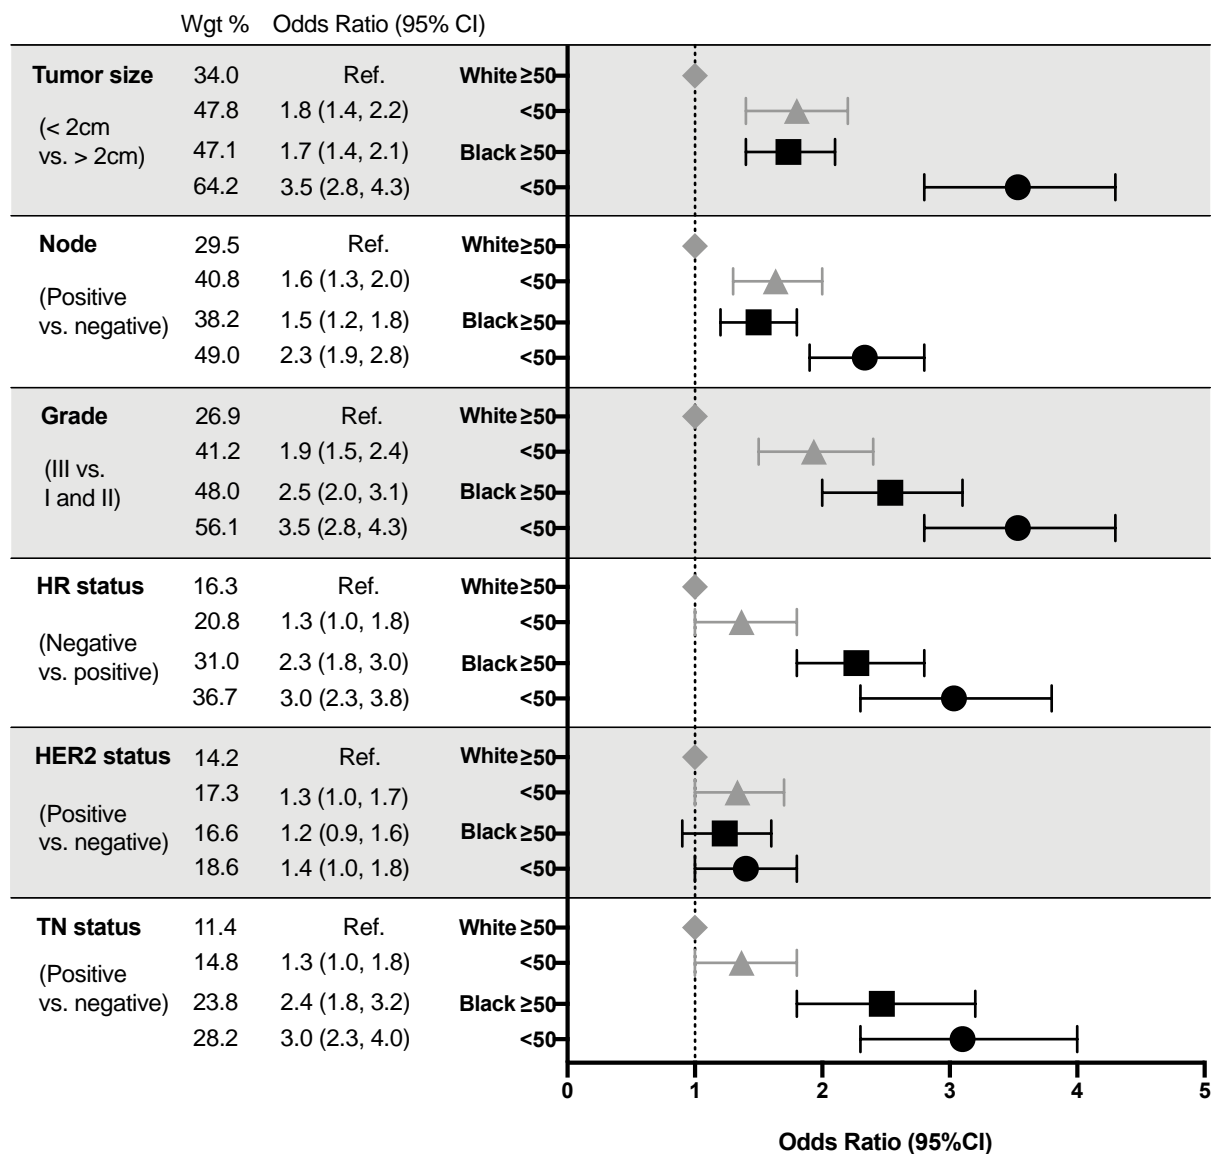

Supplemental Figure 1. Odds ratios and 95% confidence intervals for tumor characteristics by race and age in the Carolina Breast Cancer Study 3 (2008-2013),  $N = 2,998$

Supplemental Table 4. Associations among latent classes of Access to Care by SES/Comorbidity latent classes (n=2997), Carolina Breast Cancer Study (2008-2013)

| Access to Care latent classes | SES/Comorbidity latent classes |        |      |        |
|-------------------------------|--------------------------------|--------|------|--------|
|                               | High                           |        | Low  |        |
|                               | No.                            | (%)    | No.  | (%)    |
| Less Barriers                 | 1541                           | (55.8) | 1220 | (44.2) |
| More Barriers                 | 26                             | (11.0) | 210  | (89.0) |

Supplemental Table 5. Associations among latent classes of tumor characteristics and SES (n=2987), Carolina Breast Cancer Study, (2008-2013)

| Tumor Characteristics latent classes | SES/Comorbidity latent classes |        |     |        |
|--------------------------------------|--------------------------------|--------|-----|--------|
|                                      | High                           |        | Low |        |
|                                      | No.                            | (%)    | No. | (%)    |
| HR+/HER2-/Node-                      | 448                            | (50.0) | 448 | (50.0) |
| HER2+/ Higher Grade                  | 169                            | (51.2) | 161 | (48.8) |
| HR+/HER2-/Larger Tumor/Node+         | 293                            | (47.6) | 322 | (52.4) |
| TNBC/ Higher Grade                   | 656                            | (57.2) | 490 | (42.8) |

Supplemental Table 6. Associations among latent classes of tumor characteristics and access to care(n=2986), Carolina Breast Cancer Study (2008-2013)

| Tumor Characteristics latent classes | Access to Care latent classes |        |               |        |
|--------------------------------------|-------------------------------|--------|---------------|--------|
|                                      | Less Barriers                 |        | More Barriers |        |
|                                      | No.                           | (%)    | No.           | (%)    |
| HR+/HER2-/Node-                      | 1085                          | (39.4) | 61            | (26.0) |
| HER2+/ Higher Grade                  | 304                           | (11.1) | 26            | (11.1) |
| HR+/HER2-/Larger Tumor/Node+         | 799                           | (29.0) | 96            | (40.9) |
| TNBC/ Higher Grade                   | 563                           | (20.5) | 52            | (22.1) |
